# Supplementary material
Source: PubMed Central journal article supplement (PMC3367527)
Supplement: cr201244x1.pdf [file cr201244x1.pdf]

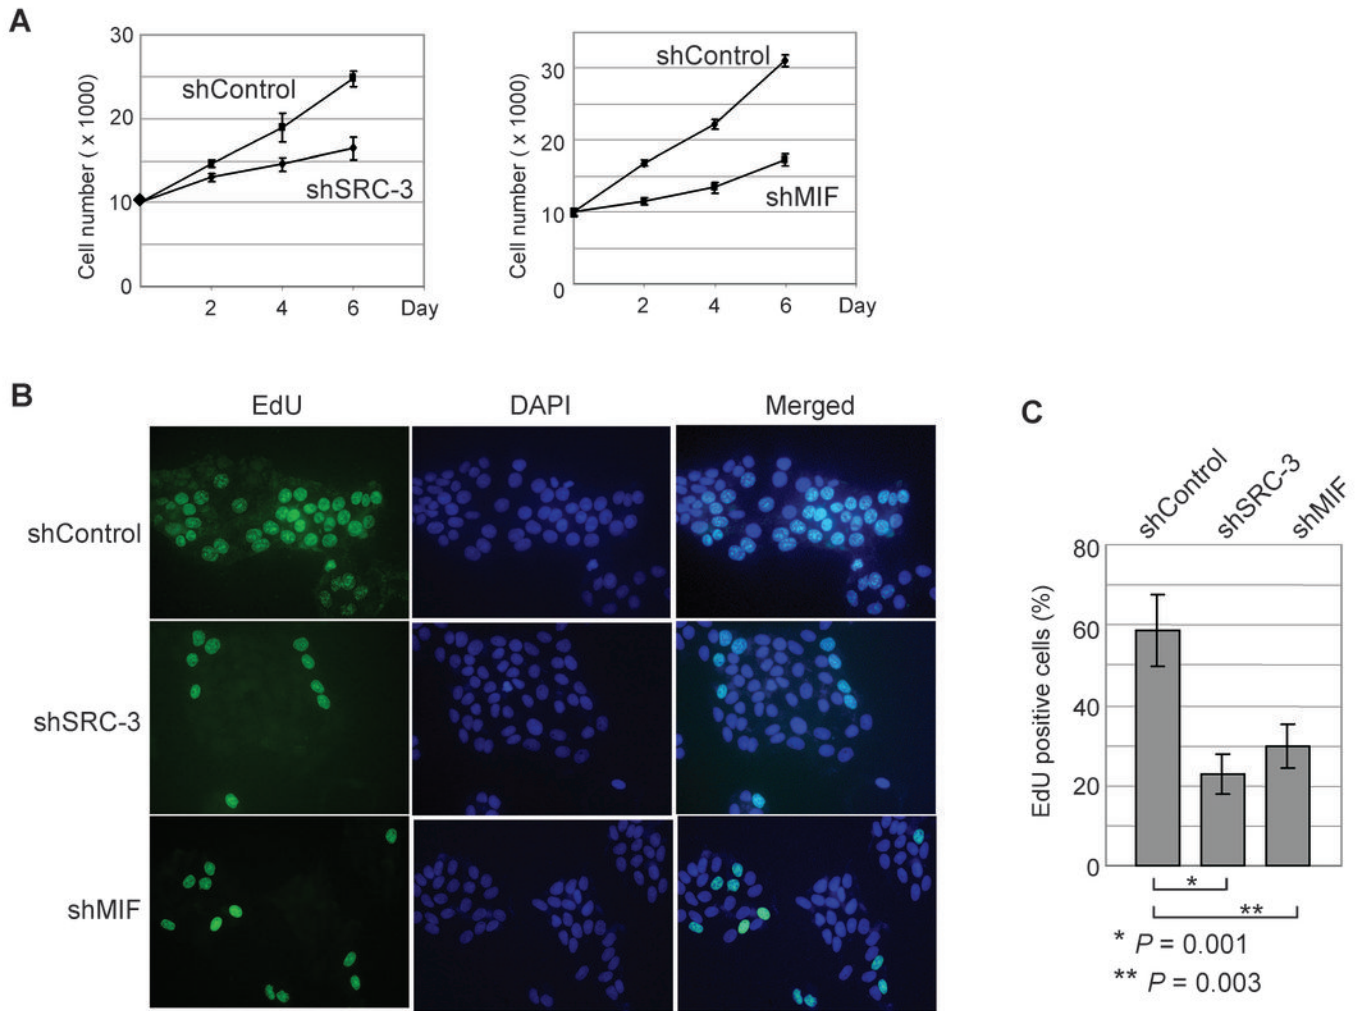

**Supplemental figure 1. Knockdown of SRC-3 or MIF inhibits cell proliferation.**

As described in Figure 6A, proliferation of MCF-7 cells after knockdown of SRC-3 (shSRC-3) or MIF (shMIF) was compared to the control cells (shControl). Cell proliferation was determined by counting the cell numbers at 2, 4 and 6 days after plating (A) or by EdU labeling (48 hours) to measure DNA synthesis (B). Quantification of EdU labeling is shown in (C) which represented the ratio of EdU positive cell to the total cell counted. More than 300 cells per group were counted in each experiment and the results were from three independent experiments. The values represent means  $\pm$  SD from three experiments.

**Supplemental figure 1**
