# Supplementary material
Source: PubMed Central journal article supplement (PMC3367527)
Supplement: cr201244x2.pdf [file cr201244x2.pdf]

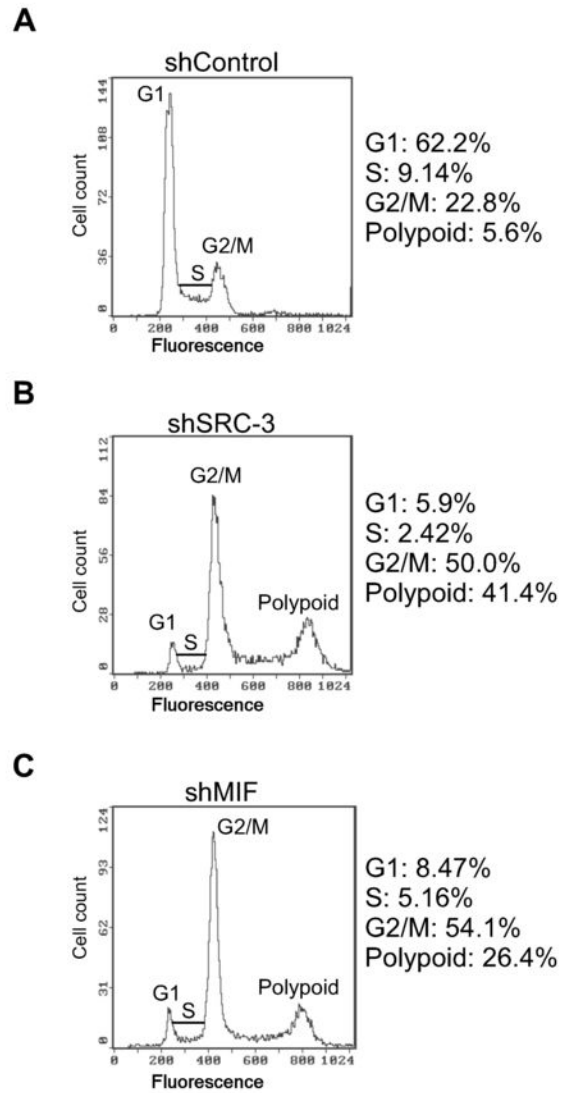

**Supplemental figure 2. Cell cycle analysis.**

Cells in different phases of the cell cycle from shSRC-3, shMIF or shControl cells were analyzed by Fluorescence-activated cell sorting (FACS).

**Supplemental figure 2**
