# Supplementary material
Source: PubMed Central journal article supplement (PMC3367527)
Supplement: cr201244x3.pdf [file cr201244x3.pdf]

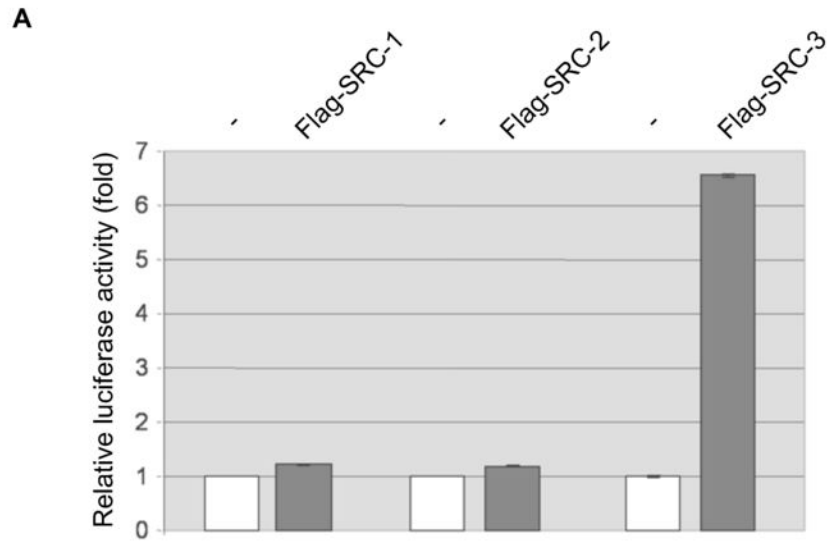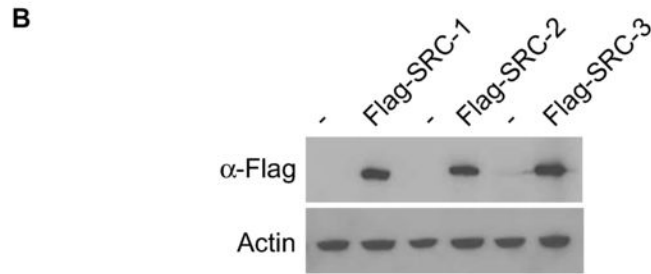

**Supplemental figure 3. Activation of the *MIF* promoter by SRC-3 and not SRC-1 or SRC-2.** (A) MCF-7 cells were transfected with the *MIF* promoter together with vector control or expression vector for SRC-1, SRC-2 or SRC-3 as indicated. The luciferase activity was measured 48 hours after transfection and normalized against total input protein. The normalized activity from vector transfected sample was set as 1. The values represented fold activation over the control and were expressed as mean  $\pm$  SD. Results are from three independent experiments performed in duplicate. (B) Immunoblot analysis showed comparable expression levels of Flag-SRC-1, Flag-SRC-2 and Flag-SRC-3.

**Supplemental figure 3**
