# Supplementary material
Source: PubMed Central journal article supplement (PMC3367527)
Supplement: cr201244x4.pdf [file cr201244x4.pdf]

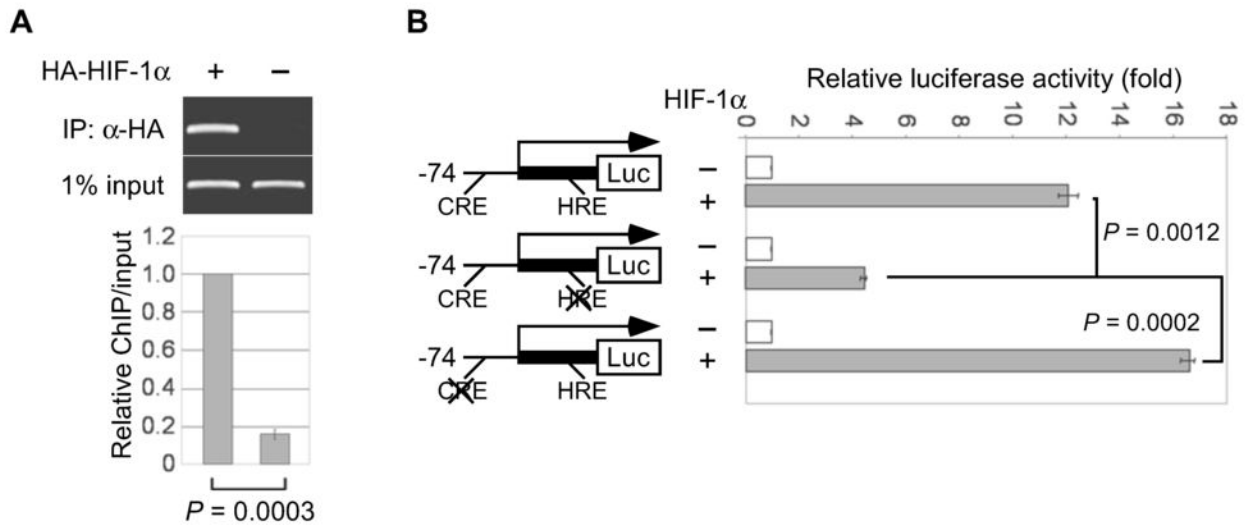

**Supplemental figure 4. Activation of the *MIF* promoter by HIF-1 $\alpha$  requires the HRE.** (A) The cell lysates from HEK293T cells transfected with the *MIF* promoter together with vector control or expression vector for HA-HIF-1 $\alpha$  were used for chromatin immunoprecipitation (Ch-IP) experiment. (Top panel) A representative gel of the PCR reaction from Ch-IP demonstrated specific recruitment of HIF-1 $\alpha$  to the *MIF* promoter. 1% input showed that equal amount of starting materials were used for the Ch-IP. (Bottom panel) Recruitment of HIF-1 $\alpha$  was further quantified by qPCR. Shown are normalized results from qPCR expressed as mean  $\pm$  SD from three experiments. (B) Wild type *MIF* promoter or promoter with mutation at the HRE or CRE was co-transfected with HIF-1 $\alpha$  expression vector into the MCF-7 cells. The luciferase activity was measured and expressed as in described. Shown are mean  $\pm$  SD from three experiments performed in duplicate.

#### Supplemental figure 4
