# Supplementary material
Source: PubMed Central journal article supplement (PMC3367527)
Supplement: cr201244x5.pdf [file cr201244x5.pdf]

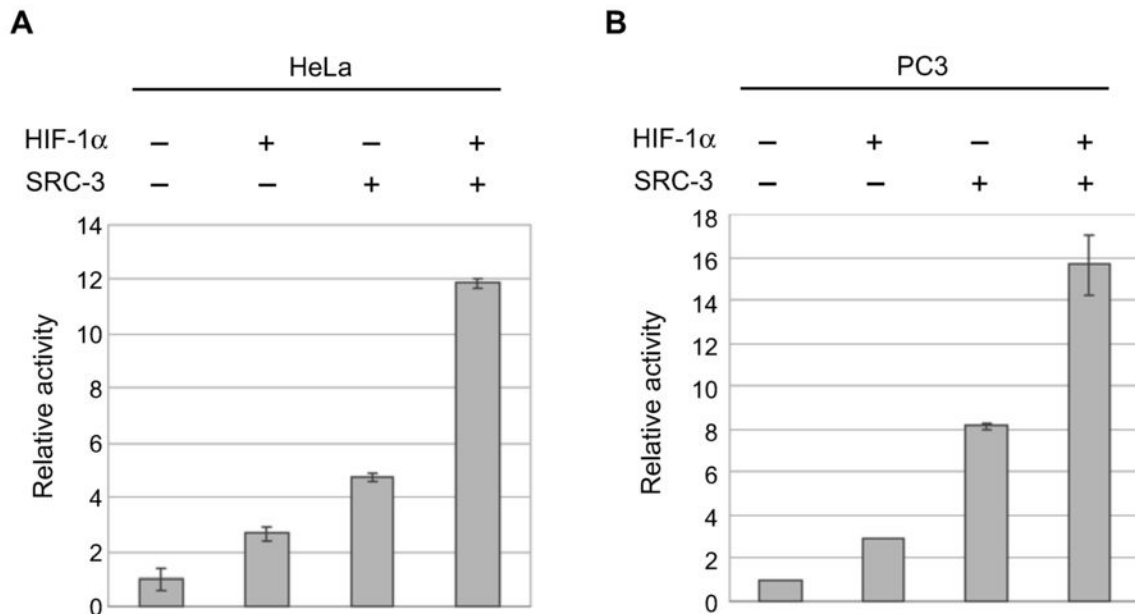

**Supplemental figure 5. Synergistic activation of the *MIF* promoter by SRC-3 and HIF-1 $\alpha$ .** The luciferase activity from HeLa cells (A) or PC3 (B) cells transfected with plasmids as described in Figure 4 was shown.

**Supplemental figure 5**
