# Supplementary material
Source: PubMed Central journal article supplement (PMC3367527)
Supplement: cr201244x6.pdf [file cr201244x6.pdf]

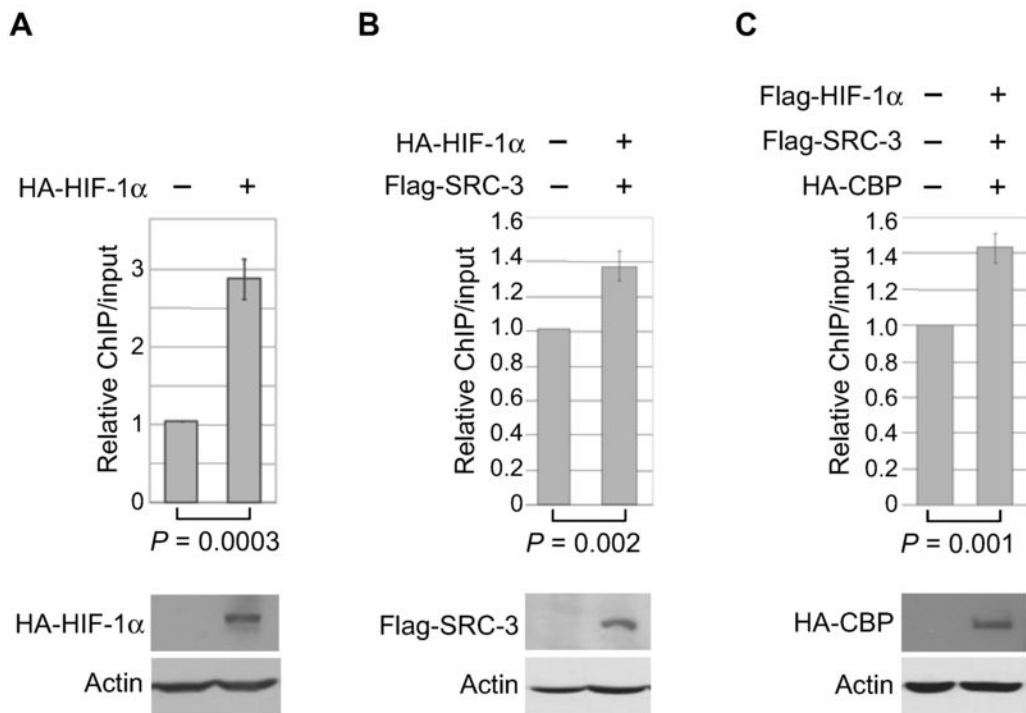

**Supplemental figure 6. Recruitment of HIF-1 $\alpha$ , SRC-3, or CBP to the endogenous *MIF* promoter.** The cell lysates from HEK293T cells transfected with the indicated expression vectors were used for chromatin immunoprecipitation (Ch-IP) experiment to demonstrate the recruitment of HIF-1 $\alpha$  (A), SRC-3 (B), or CBP (C) to the endogenous *MIF* promoter. Recruitment of each protein to the endogenous *MIF* promoter was quantified by qPCR. Shown are normalized results from qPCR results expressed as mean  $\pm$  SD from experiments performed in triplicate.

**Supplemental Figure 6**
