# Supplementary material
Source: PubMed Central journal article supplement (PMC3367527)
Supplement: cr201244x7.pdf [file cr201244x7.pdf]

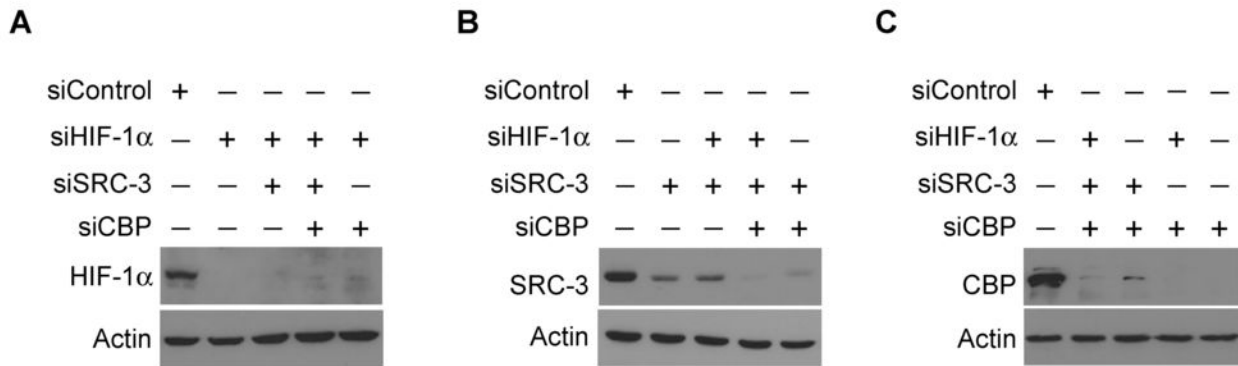

**Supplemental figure 7. Knockdown of HIF-1 $\alpha$ , SRC-3, or CBP by specific siRNAs.** Knockdown of HIF-1 $\alpha$  (A), SRC-3 (B), or CBP (C) by transfection of siRNAs (indicated by +) as described in Figure 4E was shown.

**Supplemental figure 7**
