# Supplementary material
Source: PubMed Central journal article supplement (PMC3367527)
Supplement: cr201244x9.pdf [file cr201244x9.pdf]

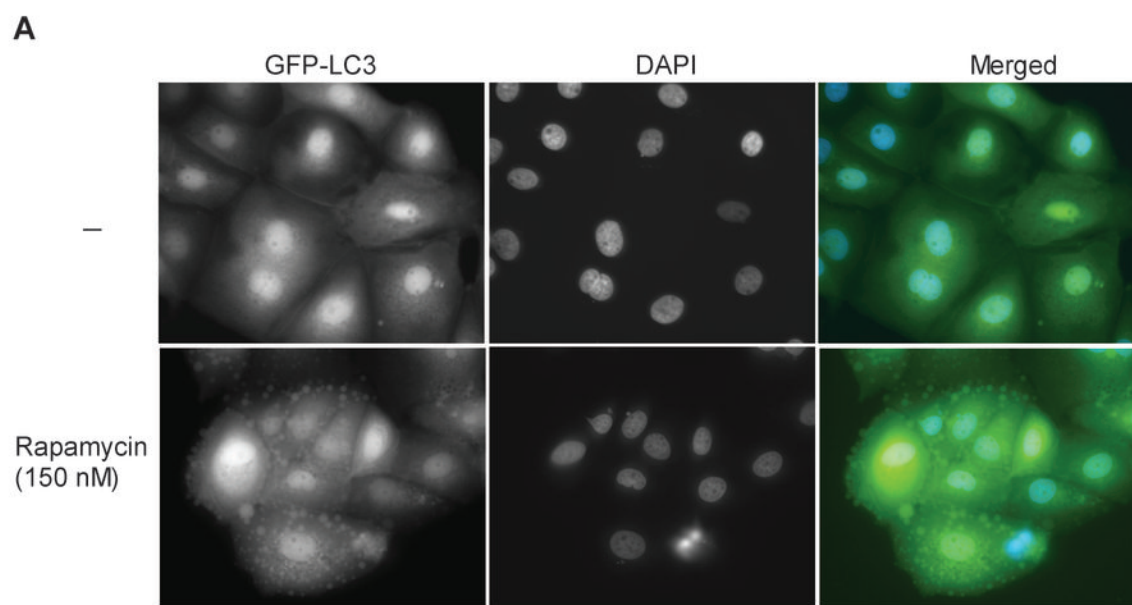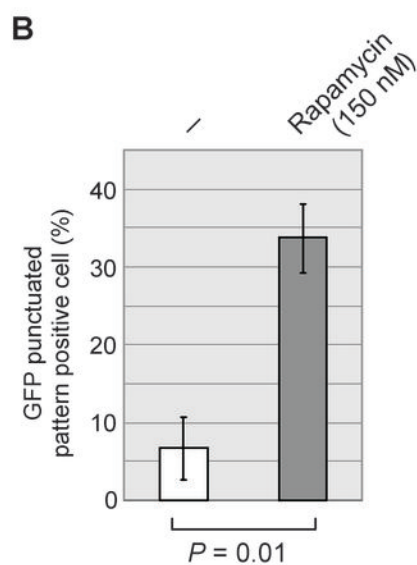

**Supplemental figure 9. Treatment of rapamycin induced punctuated GFP-LC3 structure.** Forty-eight hours after addition of rapamycin (150 nM), the cells were imaged as described in Figure 5A to detect formation of punctuated GFP-LC3 structure. Quantification represented the ratio of GFP-LC3 punctuated positive cell to the total cell counted. More than 300 cells per group were counted in each experiment and the results were from experiments performed in triplicate.

**Supplemental figure 9**
