# Supplementary material
Source: PubMed Central journal article supplement (PMC3367527)
Supplement: cr201244x10.pdf [file cr201244x10.pdf]

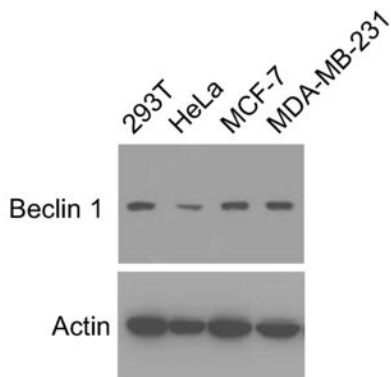

**Supplemental figure 10. Expression of Beclin 1 in MCF-7 cells.**  
The levels of Beclin 1 protein expression in 293T, HeLa, MCF-7 and MDA-MB-231 cells were determined by immunoblot analysis. Levels of actin were used as protein loading controls.

**Supplemental figure 10**
