# Supplementary material
Source: PubMed Central journal article supplement (PMC3367527)
Supplement: cr201244x12.pdf [file cr201244x12.pdf]

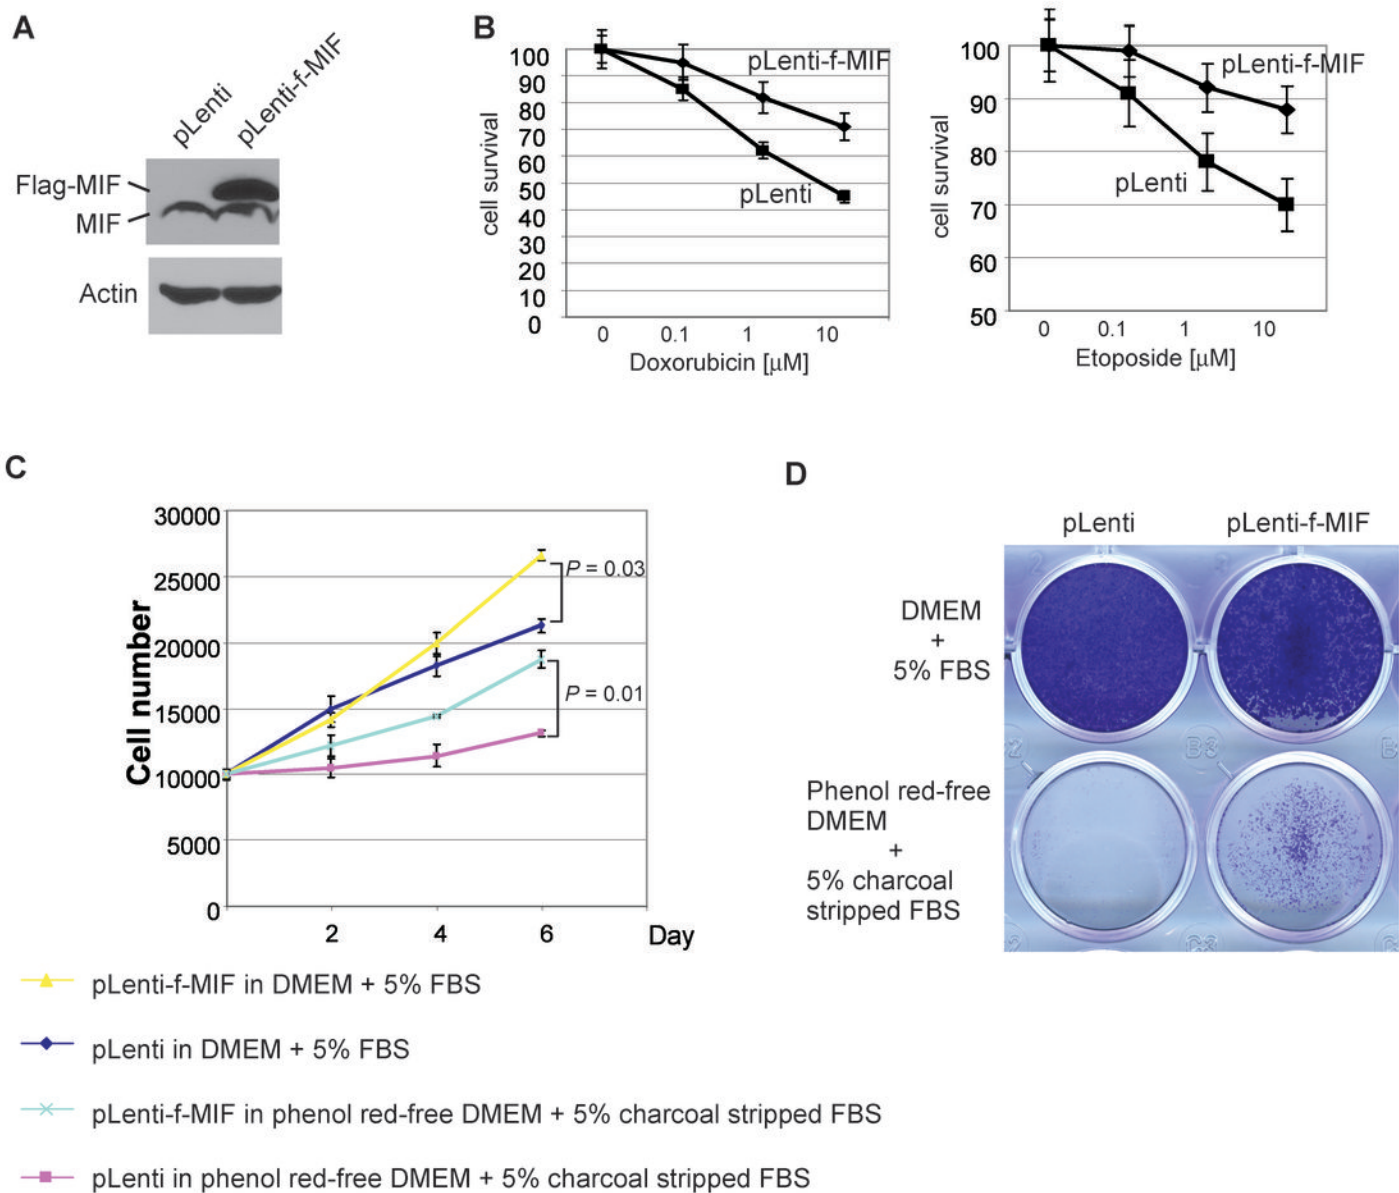

**Supplemental figure 12. Over-expression of *MIF* reduces chemosensitivity.** (A) Immunoblot analysis confirmed over-expression of *MIF* in MCF-7 cells transduced with lentivirus carrying *MIF* cDNA. (B) Compared to control cells (pLenti), over-expression of *MIF* reduces the cytotoxicity of doxorubicin and etoposide in MCF-7 cells. (C) Proliferation of MCF-7 cells with or without over-expression of *MIF* grown in complete medium or charcoal stripped medium were determined by counting the cell numbers at 2, 4 and 6 days after plating. (D) The cells were grown in conditions as in (C) for a month and stained with crystal violet to visualize the colony. Results represent the mean  $\pm$  SD from three independent experiments. Difference is considered significant at the 95% confidence level.

**Supplemental Figure 12**
